# Supplementary material
Source: PubMed Central journal article supplement (PMC4767408)
Supplement: supp_mol.115.101246_Supplementary_Table_1.pdf [file supp_mol.115.101246_Supplementary_Table_1.pdf]

**Supplementary Table 1. ECL1 distance constraints and other constraints used in Modeller.** The ECL1 constraints were used to control the orientation of the ECL1 helix in line with the variability data (Baldwin et al., 1997; Vohra et al., 2013) and were chosen by visual analysis. Torsional constraints applied to the C $\alpha$  coordinates were also used to constrain the backbone conformation of the 4 C-terminal residues of Gs, namely Y391-L394.

| GLP-1/GLP-1R<br>position (A) | GLP-1R/GLP-1<br>position (B) | constraint         |
|------------------------------|------------------------------|--------------------|
| TM2; M204; C <sub>i</sub>    | GLP-1; V26; C <sub>1,1</sub> | $r_{AB} \leq 8.0$  |
| ECL1; W214; C <sub>2,2</sub> | GLP-1; V16; C <sub>1,1</sub> | $r_{AB} \geq 12.0$ |
| ECL1; W214; C <sub>2,2</sub> | TM2; W203; C <sub>3,3</sub>  | $r_{AB} \geq 5.0$  |
| ECL1; H212; C <sub>1,1</sub> | GLP-1; F12; C <sub>i</sub>   | $r_{AB} \geq 10.0$ |
| ECL1; H212; C <sub>1,1</sub> | GLP-1; V16; C <sub>i</sub>   | $r_{AB} \geq 12.0$ |
| ECL1; H212; C <sub>1,1</sub> | GLP-1; M13; C <sub>i</sub>   | $r_{AB} \geq 12.0$ |
| ECL1; H212; C <sub>1,1</sub> | GLP-1; L20; C <sub>i</sub>   | $r_{AB} \geq 12.0$ |
| ECL1; Q213; C <sub>i</sub>   | GLP-1; H19; C <sub>i</sub>   | $r_{AB} \geq 10.0$ |
| ECL1; D215; C <sub>i</sub>   | GLP-1; V16; C <sub>i</sub>   | $r_{AB} \geq 12.0$ |
| TM3; C226; C <sub>i</sub>    | ECL2; C296; C <sub>i</sub>   | disulfide          |
| GLP-1; D15                   | GLP-1; L33                   | helix              |
| Helix 8; T378                | Helix 8; S392                | helix              |
| TM2; V194                    | TM3; A209                    | helix              |
| TM3; A221                    | TM3; F232                    | helix              |

Baldwin, J. M.; Schertler, G. F.; Unger, V. M. An alpha-carbon template for the transmembrane helices in the rhodopsin family of G-protein-coupled receptors. *Journal of Molecular Biology* **1997**, 272, 144-164.

Vohra, S.; Taddese, B.; Conner, A. C.; Poyner, D. R.; Hay, D. L.; Barwell, J.; Reeves, P. J.; Upton, G. J.; Reynolds, C. A. Similarity between class A and class B G-protein-coupled receptors exemplified through calcitonin gene-related peptide receptor modelling and mutagenesis studies. *J R. Soc Interface* **2013**, 10, 20120846.
